# Supplementary material for: Evaluation of Dust Emission and Land Surface Schemes in Predicting a Mega Asian Dust Storm over South Korea Using WRF-Chem (v4.3.3)
Source: Copernicus journal article supplement (doi:10.5194/gmd-2024-114), 2024-07-23
Supplement: Supplementary file 1 [file gmd-2024-114-supplement.pdf]

# **Evaluation of Dust Emission and Land Surface Schemes in Predicting a Mega Asian Dust Storm over South Korea Using WRF-Chem (v4.3.3)**

Ji Won Yoon et al.

*Correspondence to:* Seon Ki Park ([spark@ewha.ac.kr](mailto:spark@ewha.ac.kr))

## Figure list

Figure S1. Same as in Fig. 4 but for root mean square error (RMSE).

Figure S2. Same as in Fig. 4 but for mean bias error (MBE).

Figure S3. Same as in Fig. 5 but for PM10 concentration, using UoC04-based combinations: (a) UoC04-Noah, (b) UoC04-RUC, (c) UoC04-Noah-MP, (d) UoC04-CLM4.

Figure S4. Same as in Fig. 8 but for combinations of all land surface schemes and UoC04: the green for UoC04-Noah, the blue for UoC04-RUC, the lime green for UoC04-Noah-MP, and the red for UoC04-CLM4.

Figure S5. Same as in Fig. 9 but for the scheme combinations---the lime green for UoC04-Noah, the blue for UoC04-RUC, the green for UoC04-Noah-MP, and the red for UoC04-CLM4.

Figure S6. Same as in Fig. 10 but for combinations of all land surface schemes and UoC04.

Figure S7. Same as in Fig. 11 but for the combinations of all land surface schemes and UoC04---(a) UoC04-Noah, (b) UoC04-RUC, (c) UoC04-Noah-MP, (d) UoC04-CLM4.

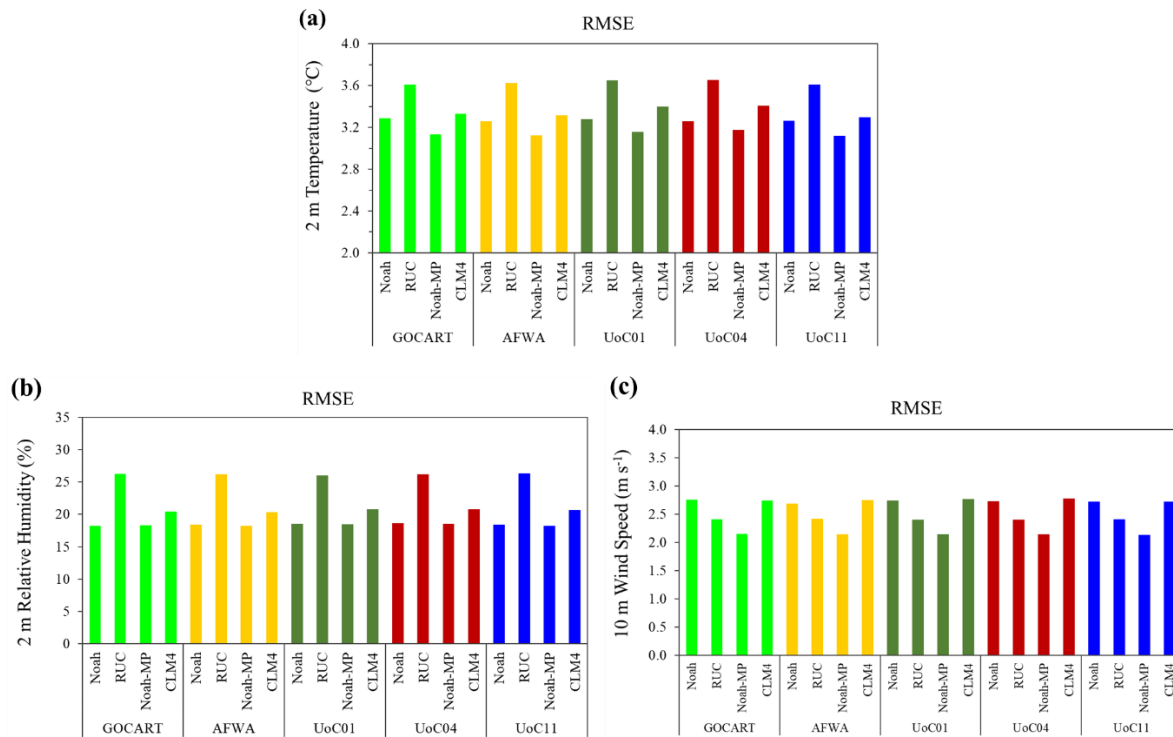

**Figure S1:** Same as in Fig. 4 but for root mean square error (RMSE).

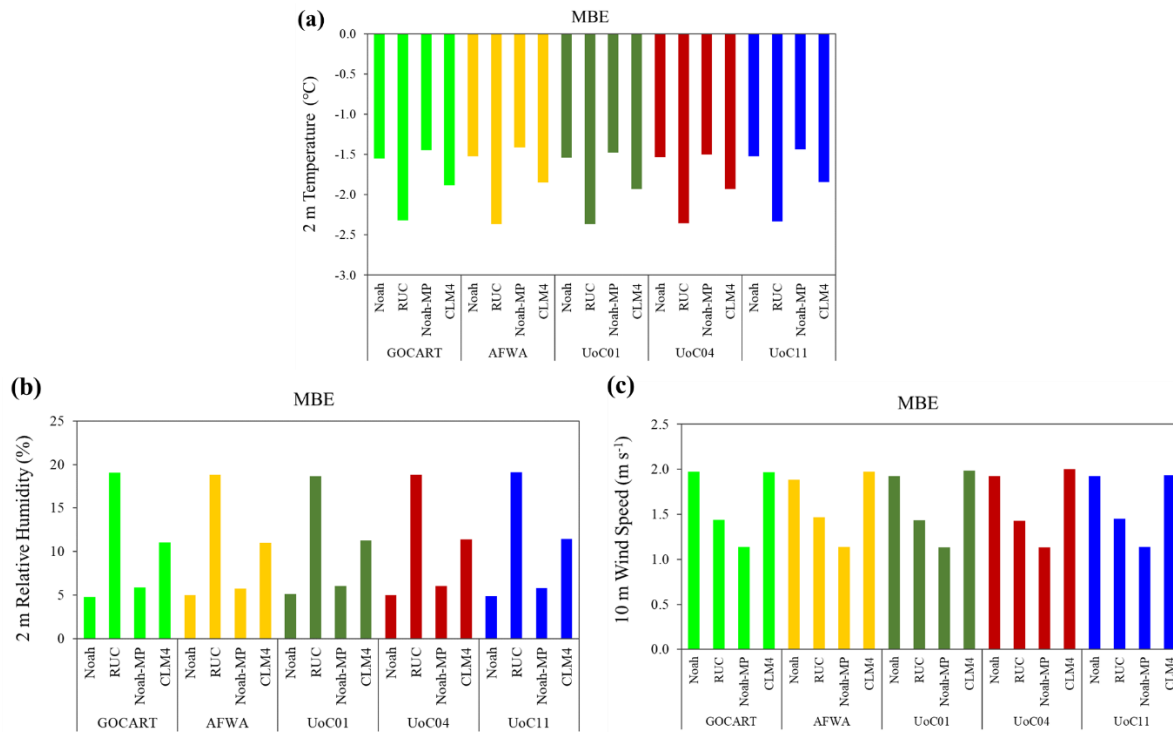

**Figure S2:** Same as in Fig. 4 but for mean bias error (MBE).

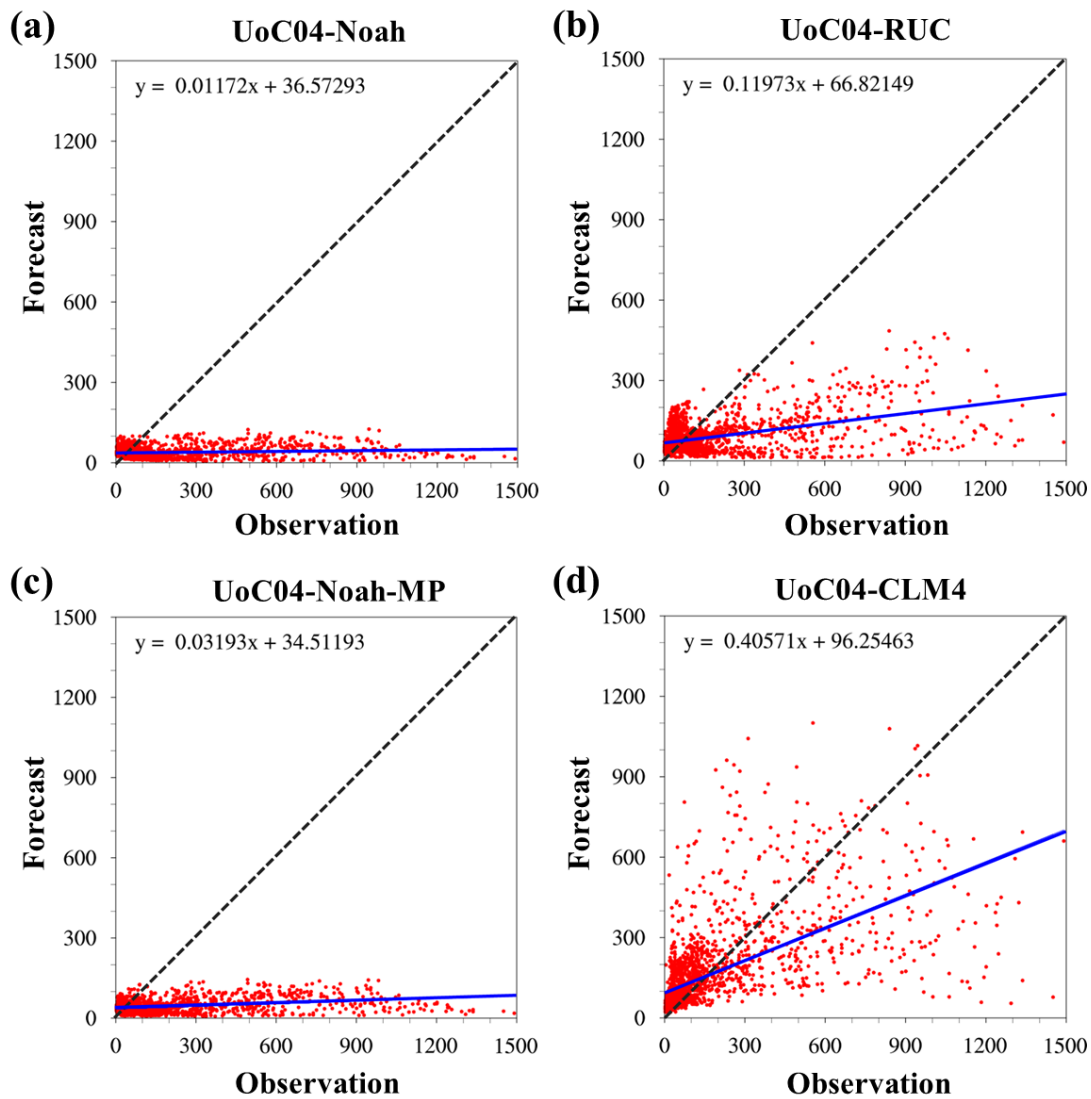

Figure S3: Same as in Fig. 5 but for PM10 concentration, using UoC04-based combinations: (a) UoC04-Noah, (b) UoC04-RUC, (c) UoC04-Noah-MP, (d) UoC04-CLM4.

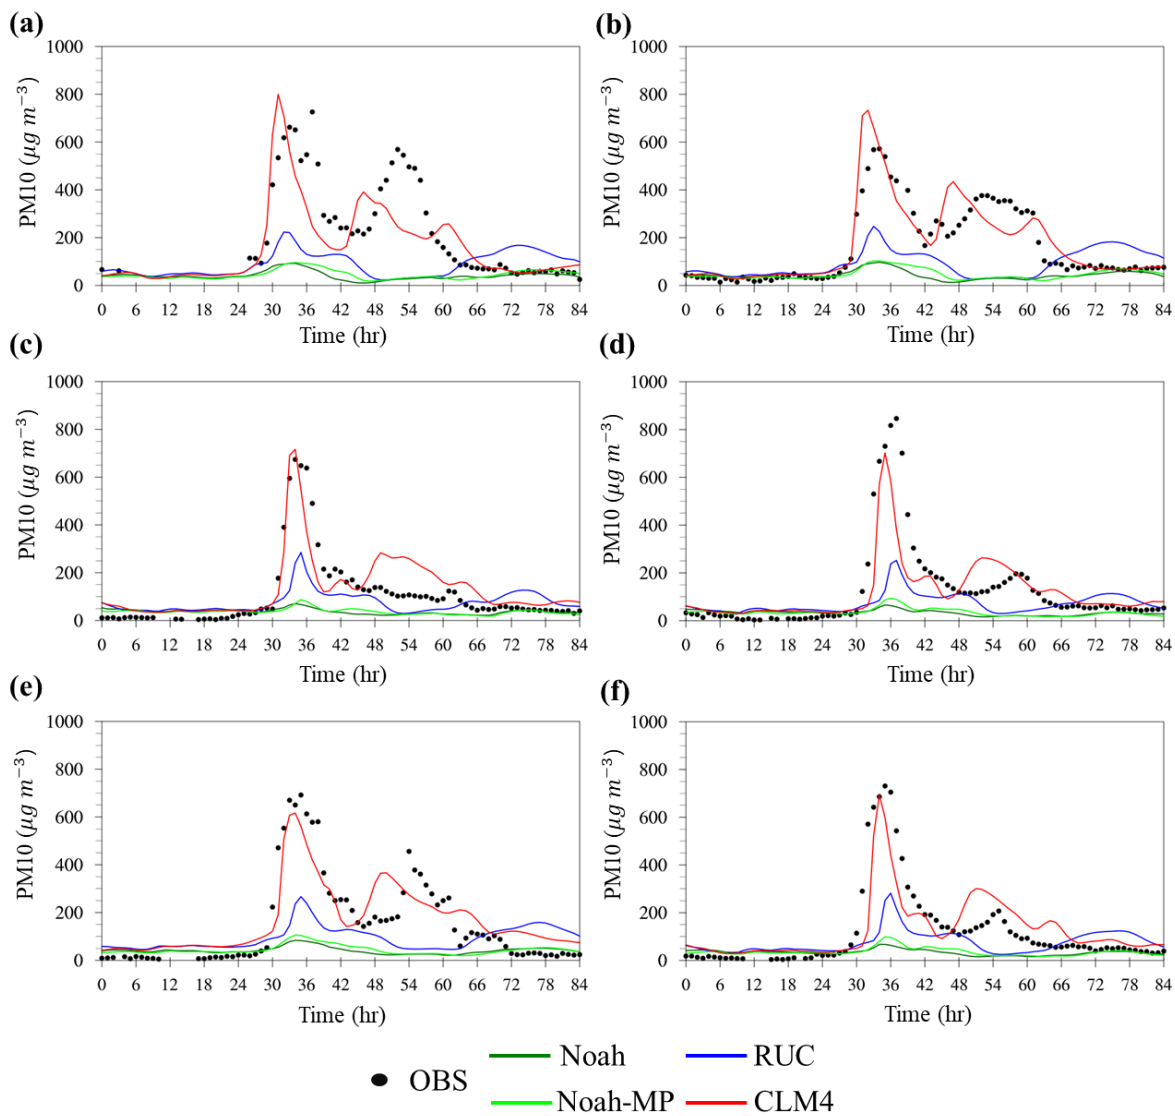

**Figure S4:** Same as in Fig. 8 but for combinations of all land surface schemes and UoC04: the green for UoC04-Noah, the blue for UoC04-RUC, the lime green for UoC04-Noah-MP, and the red for UoC04-CLM4.

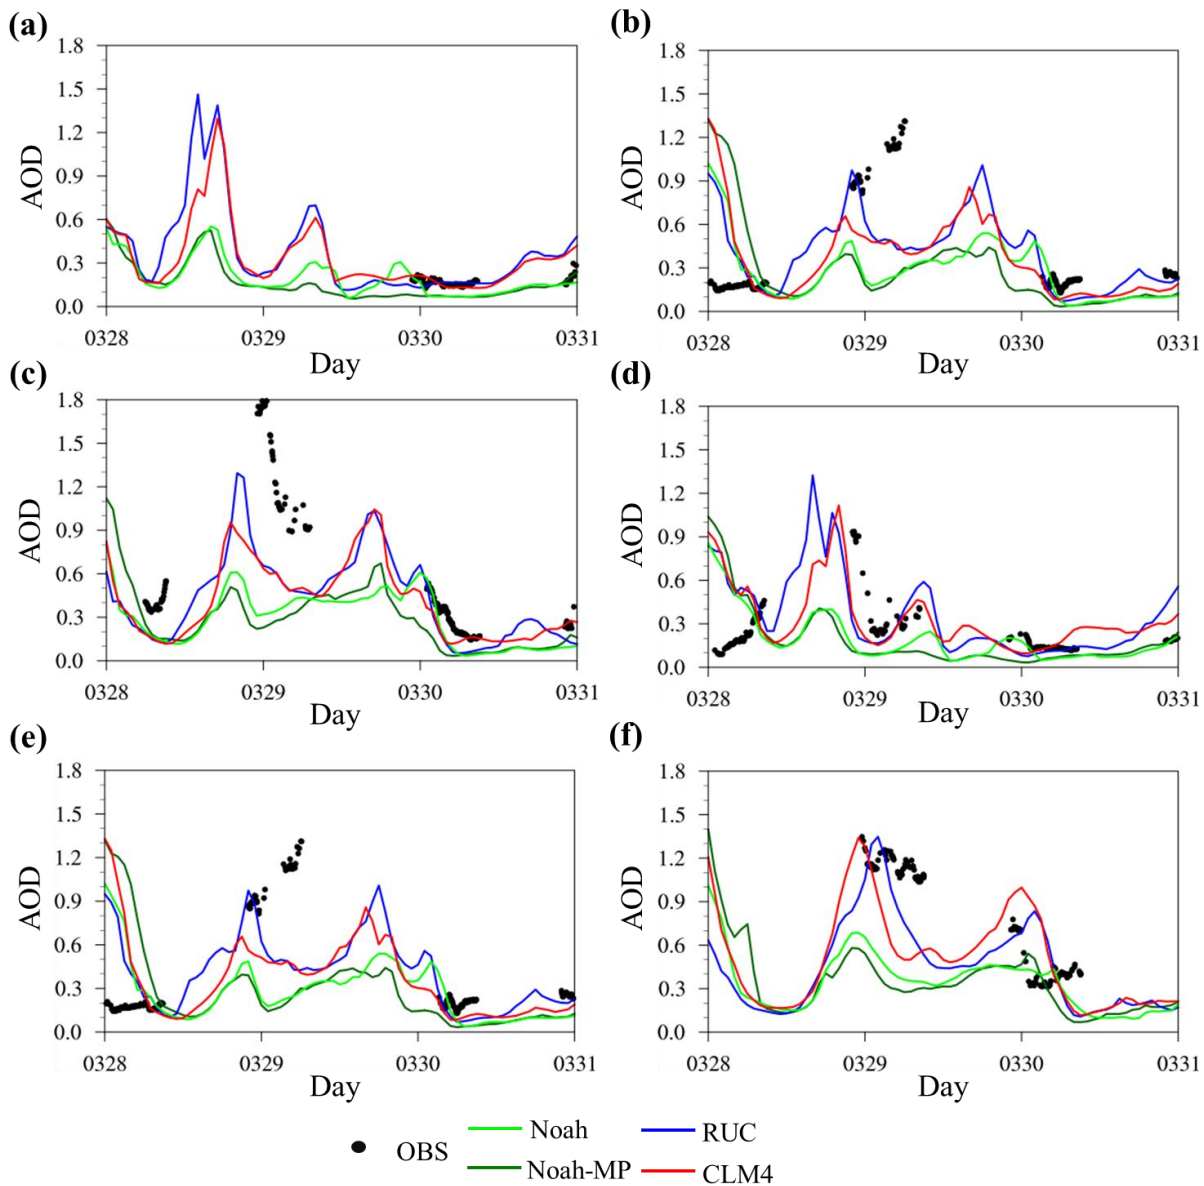

Figure S5: Same as in Fig. 9 but for the scheme combinations---the lime green for UoC04-Noah, the blue for UoC04-RUC, the green for UoC04-Noah-MP, and the red for UoC04-CLM4.

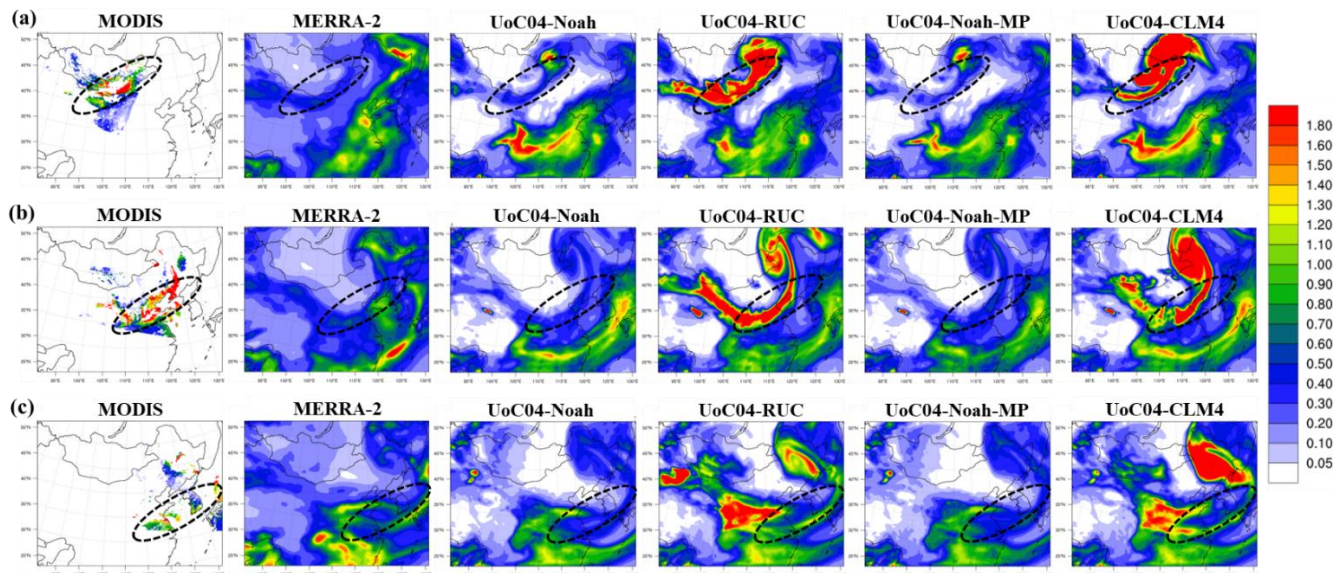

Figure S6: Same as in Fig. 10 but for combinations of all land surface schemes and UoC04.



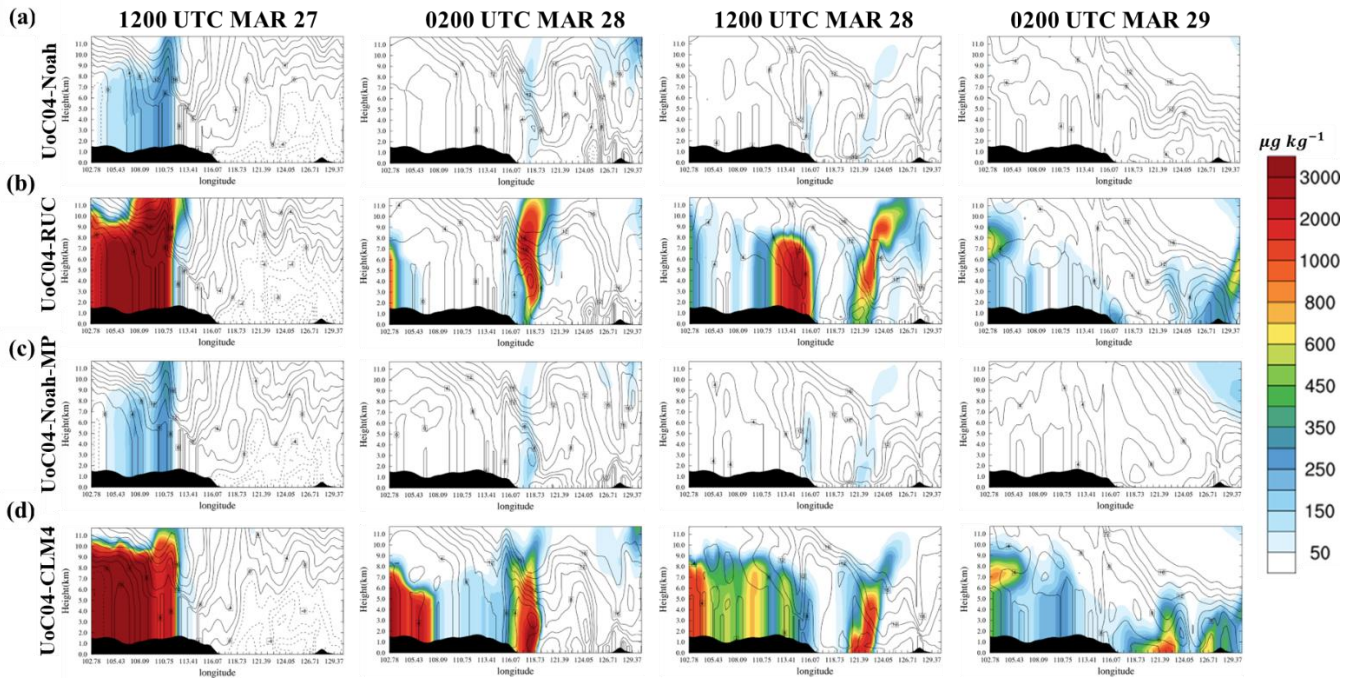

Figure S7: Same as in Fig. 11 but for the combinations of all land surface schemes and UoC04---(a) UoC04-Noah, (b) UoC04-RUC, (c) UoC04-Noah-MP, (d) UoC04-CLM4.
